# Supplementary material
Source: PubMed Central journal article supplement (PMC6892640)
Supplement: EMS85050-supplement-Supplementary_Material.pdf [file EMS85050-supplement-Supplementary_Material.pdf]

## Supplementary Materials for

### Neutrophil extracellular traps drive inflammatory pathogenesis in malaria

Sebastian Lorenz Knackstedt, Athina Georgiadou, Falko Apel, Ulrike Abu-Abed, Christopher A. Moxon, Aubrey J. Cunnington, Bärbel Raupach, Deirdre Cunningham, Jean Langhorne, Renate Krüger, Valentina Barrera, Simon P. Harding, Aase Berg, Sam Patel, Kari Otterdal, Benjamin Mordmüller, Evelin Schwarzer, Volker Brinkmann, Arturo Zychlinsky, Borko Amulic\*

\*Corresponding author. Email: borko.amulic@bristol.ac.uk

Published 18 October 2019, *Sci. Immunol.* 4, eaaw0336 (2019)

DOI: 10.1126/sciimmunol.aaw0336

#### The PDF file includes:

- Fig. S1. In vitro stimulations of human neutrophils.
- Fig. S2. Necrosis and sequestration in the livers of *P. chabaudi*-infected mice.
- Fig. S3. Pathology in the lungs of *P. chabaudi*-infected animals.
- Fig. S4. Parasitemia of NET fragment-injected mice.
- Fig. S5. Immunofluorescence images used to quantify neutrophils in livers of infected mice.
- Fig. S6. Quantification of free circulating heme in plasma of uninfected and infected animals, treated with a G-CSF neutralizing antibody or isotype control antibody.
- Table S1. Patient information of cohort 1 and 2 in Gabon.
- Table S2. Clinical characteristics of the patient population in Mozambique.
- Table S3. Clinical diagnosis and classification of subjects whose ocular tissue was used for immunofluorescence experiments.

#### Other Supplementary Material for this manuscript includes the following:

(available at [immunology.sciencemag.org/cgi/content/full/4/40/eaaw0336/DC1](https://immunology.sciencemag.org/cgi/content/full/4/40/eaaw0336/DC1))

Data file S1. Raw data in Excel spreadsheet.

**Figure S1**

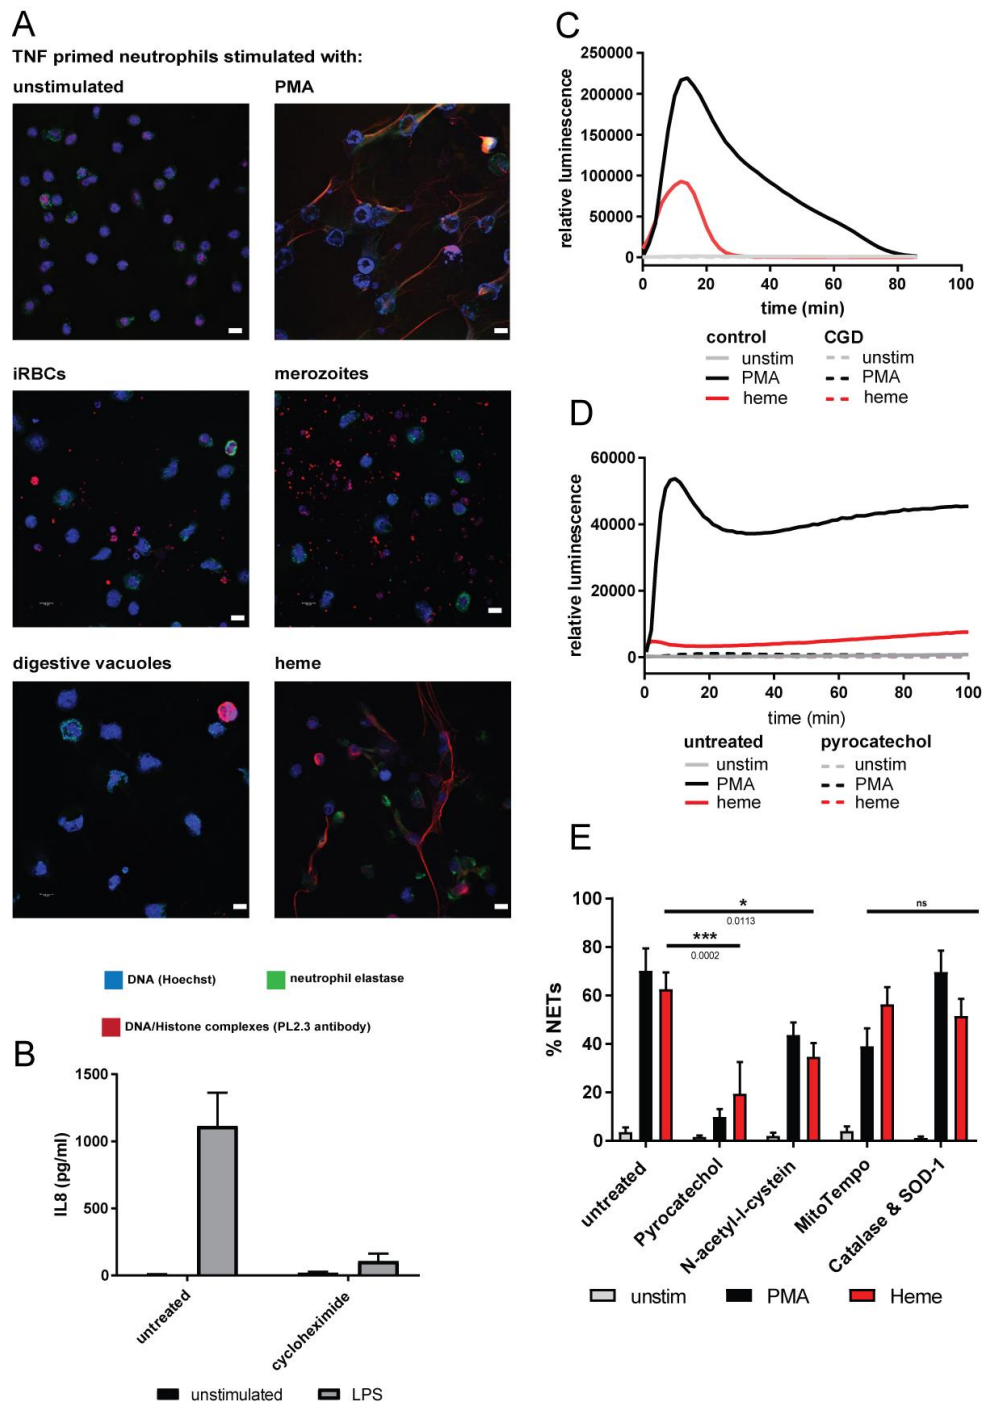

**Fig. S1. In vitro stimulations of human neutrophils. (A)** Confocal microscopy images of TNF primed neutrophils stimulated with malaria associated PAMPs and DAMPs; PMA serves as a positive control. Scale bars represent 20  $\mu$ m. **(B)** IL-8 ELISA of supernatants from neutrophils treated with LPS. IL-8 is not stored in the neutrophil and its release requires translation. **(C)** Production of ROS measured by luminol assay **(D)** Production of ROS by neutrophils treated with pyrocatechol. Cells are unable to produce ROS in response to both PMA or heme. **(E)** Quantification of NET formation induced by PMA or heme in healthy human neutrophils pretreated with the indicated ROS scavenging agents at the following concentrations: 30  $\mu$ M pyrocatechol, 10 mM N-acetyl-L-cysteine, 10  $\mu$ M MitoTempo, 10 ng/ $\mu$ l catalase & 10 ng/ $\mu$ l SOD-1. Data is presented as the mean  $\pm$  SEM.

**Figure S2:**

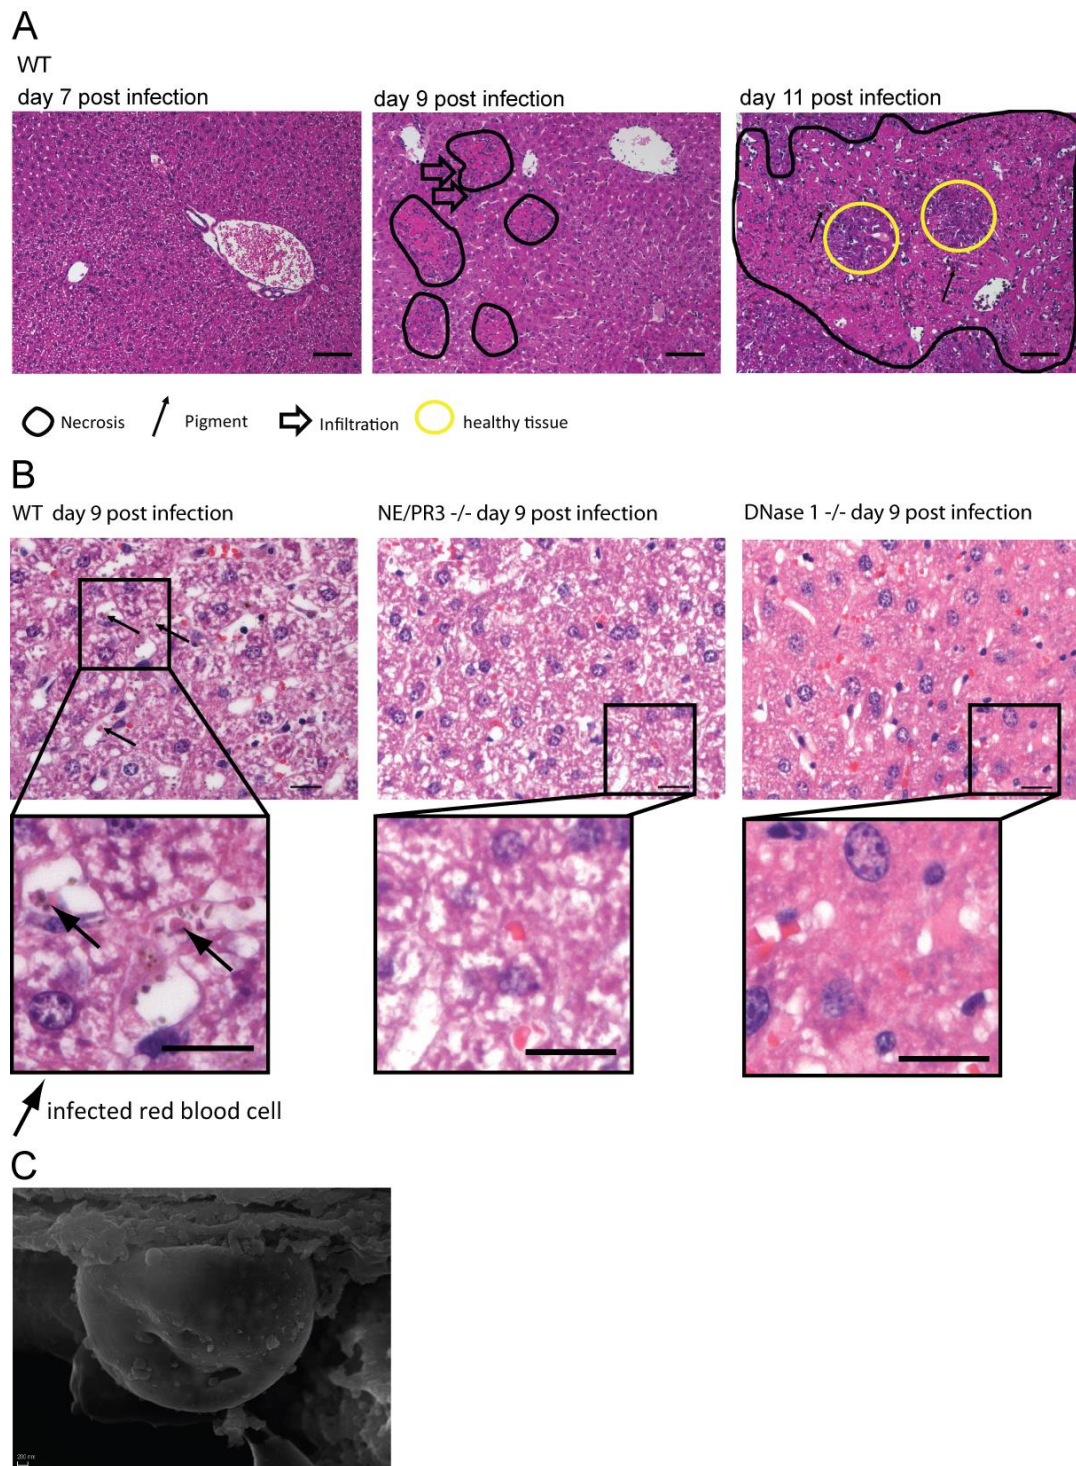

**Fig. S2. Necrosis and sequestration in the livers of *P. chabaudi*-infected mice. (A)** Sample images of H&E stained liver sections used to quantify liver damage. Black outlines indicate areas containing necrotic liver cells, large arrows indicate immune cell infiltration and yellow outlines indicated healthy tissue surrounded by necrosis. Analysis was performed blinded by a pathologist, scale bar equals 100  $\mu$ m. **(B)** Representative H&E stained images of livers from infected animals, arrows indicate iRBCs bound to the endothelium, scale bar equals 20  $\mu$ m. **(C)** Electron micrograph of an infected red blood cell attached to the vasculature in the liver of a WT mouse.

Figure S3

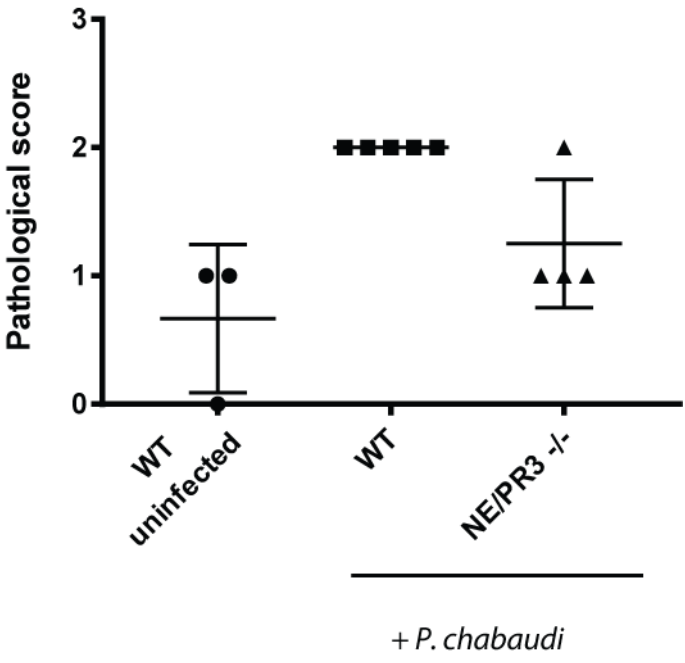

Fig. S3. Pathology in the lungs of *P. chabaudi*-infected animals. Blinded scoring of lungs from infected animals at peak parasitemia, according to score sheet presented in Methods.

Figure S4:

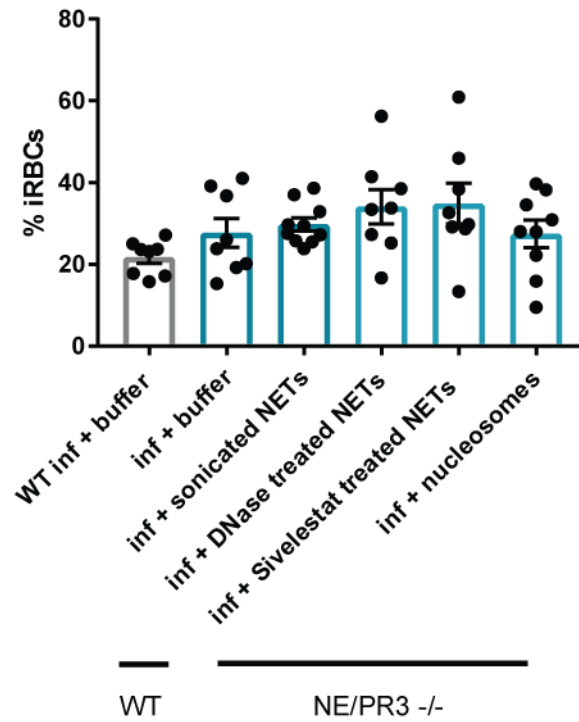

**Fig. S4. Parasitemia of NET fragment-injected mice.** Parasitemia of infected animals quantified by counting Giemsa-stained thin blood smears.



**Figure S5:**

WT

uninfected

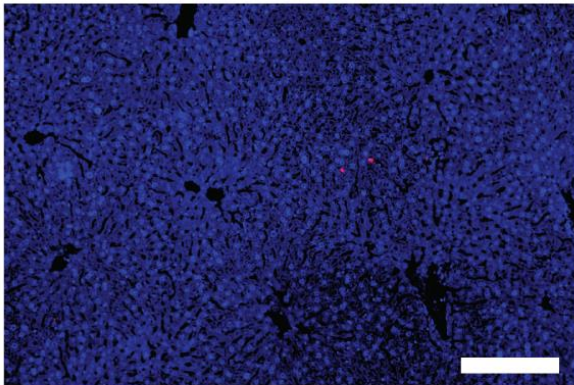

day 9 post infection

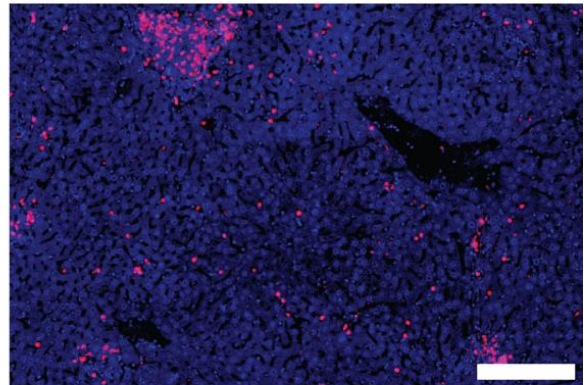

NE/PR3 -/-

uninfected

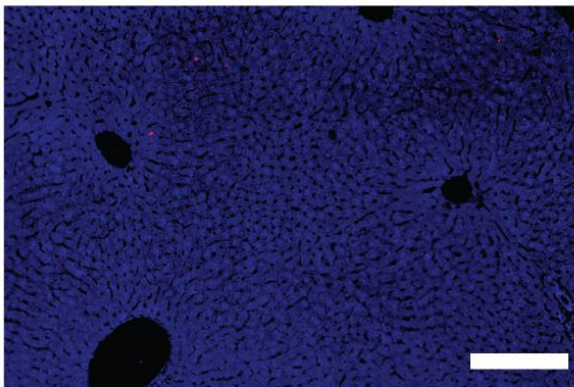

day 9 post infection

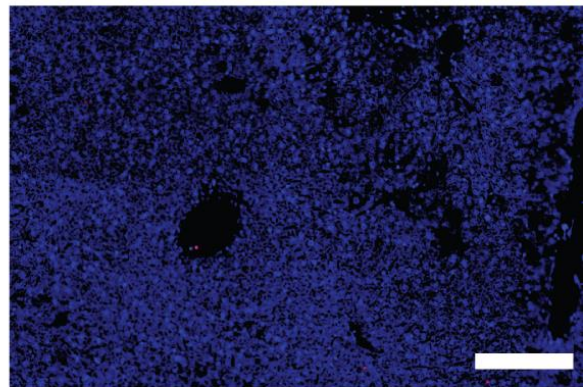

DNase 1 -/-

uninfected

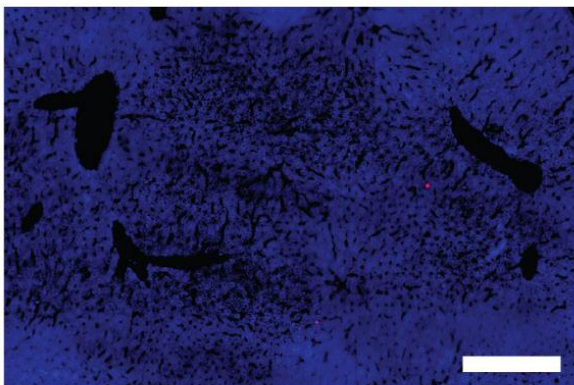

day 9 post infection

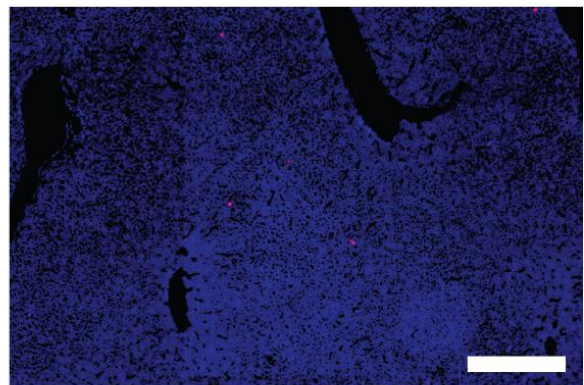

■ DNA

■ Calgranulin A (neutrophils)

**Fig. S5. Immunofluorescence images used to quantify neutrophils in livers of infected mice.** Sample images of livers from infected animals of indicated genotypes stained with Hoechst (blue) and a neutrophil specific anti-calgranulin A antibody (red).

Figure S6

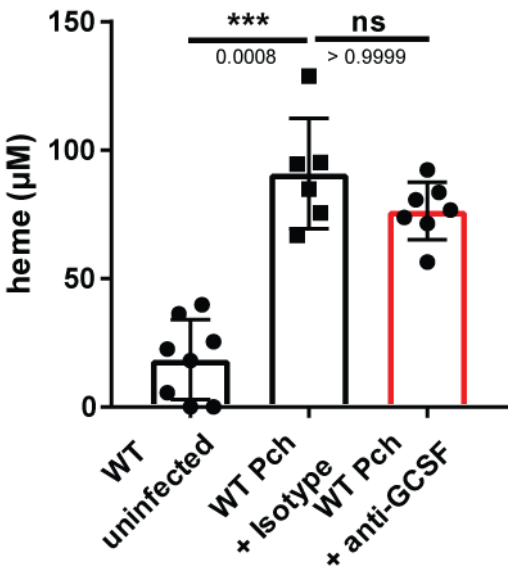

Fig. S6. Quantification of free circulating heme in plasma of uninfected and infected animals, treated with a G-CSF neutralizing antibody or isotype control antibody.

**Table S1. Patient information of cohort 1 and 2 in Gabon.**

|                     | Cohort 1            | Cohort 2            |                         |
|---------------------|---------------------|---------------------|-------------------------|
|                     | Uncomplicated       | Uncomplicated       | Severe                  |
| n                   | 43                  | 10                  | 23                      |
|                     | Mean (min - max)    |                     |                         |
| Age (years)         | 1 (1 - 84)          | 4 (3 - 7)           | 4 (1 - 10)              |
| Parasitemia (pf/μl) | 1635 (59 - 260113)  | 7595 (2100 - 20000) | 335743 (2600 – 1100000) |
| Temperature (°C)    | 38 (37 - 40)        | n.a.                | n.a.                    |
| Hematocrit (%)      | 33.45 (19.2 - 44.9) | n.a.                | n.a.                    |
| Hemoglobin (g/dl)   | 10.1 (4.2 - 17.7)   | 10.1 (9.1 - 12.2)   | 8.76 (5 - 13.2)         |



**Table S2. Clinical characteristics of the patient population in Mozambique.**

|                                  | Uncomplicated malaria |                 | Severe malaria      |                 |
|----------------------------------|-----------------------|-----------------|---------------------|-----------------|
| n                                | 28                    |                 | 27                  |                 |
|                                  | Mean<br>(min-max)     | %<br>proportion | Mean<br>(min – max) | %<br>proportion |
| Age                              | 36 (18-73)            |                 | 42 (20-65)          |                 |
| Sex (females)                    |                       | 35.7 (10/28)    |                     | 44.4 (12/27)    |
| Hb                               | 11.7 (5.9-15.7)       |                 | 10.8 (3.2-17.0)     |                 |
| WBC                              | 6.1 (2.2-12.4)        |                 | 7.5 (1.3-15.5)      |                 |
| Platelets                        | 119 (24-324)          |                 | 127 (11-452)        |                 |
| Creatinine                       | 108 (57-203)          |                 | 152 (72-357)        |                 |
| Se-glucosis                      | 9.0 (4.2-34.2)        |                 | 9.0 (3.7-40.5)      |                 |
| Systolic BP                      | 123 (90-240)          |                 | 119 (70-160)        |                 |
| Respiratory rate                 | 20 (14-28)            |                 | 25 (16-68)          |                 |
| Liver failure <sup>a)</sup>      |                       | 0               |                     | 11.1 (3/27)     |
| Coagulat. disturb. <sup>b)</sup> |                       | 0               |                     | 3.7 (1/27)      |
| Cerebral disturb. <sup>c)</sup>  |                       | 14.3 (4/28)     |                     | 29.6 (8/27)     |
| Case fatality rate               |                       | 0 <sup>d)</sup> |                     | 3.7 (1/27)      |

<sup>a)</sup> Defined as jaundice and/or bilirubin >43 µmol/L

<sup>b)</sup> Defined as bleeding disturbances and/or hemolysis

<sup>c)</sup> Defined as Glasgow Coma Scale ≤11, repeated convulsions and/or confusion

<sup>d)</sup> Two patients missing

Continuous variables given in mean (min-max), not rounded numbers.

**Table S3. Clinical diagnosis and classification of subjects whose ocular tissue was used for immunofluorescence experiments.**

| <b>Sample</b> | <b>Before post-mortem clinical diagnosis</b>               | <b>Post-mortem classification</b> | <b>Retinopathy</b> |
|---------------|------------------------------------------------------------|-----------------------------------|--------------------|
| 1             | Clinical CM                                                | 1                                 | Yes                |
| 2             | Clinical CM                                                | 1                                 | Yes                |
| 3             | Clinical CM                                                | 1                                 | Yes                |
| 4             | Clinical CM                                                | 1                                 | Yes                |
| 5             | Clinical CM                                                | 1                                 | Yes                |
| 6             | Clinical CM + SMA                                          | 2                                 | Yes                |
| 7             | Clinical CM                                                | 2                                 | Yes                |
| 8             | Clinical CM, severe pneumonia, severe meningoencephalitis  | 2                                 | Yes                |
| 9             | Clinical CM                                                | 2                                 | Yes                |
| 10            | Clinical CM – pneumonia, Reye's syndrome                   | 3                                 | No                 |
| 11            | Clinical CM, likely cause of death is anemia               | 3                                 | No                 |
| 12            | Clinical CM + SMA, hepatitis                               | 3                                 | No                 |
| 13            | Clinical CM; Severe pneumonia                              | 3                                 | No                 |
| 14            | Clinical CM, severe pneumonia with spread to meninges      | 3                                 | No                 |
| 15            | Clinical CM, left ventricular failure with pulmonary edema | 3                                 | No                 |
| 16            | Clinical CM, fatal pneumonia                               | 3                                 | No                 |
| 17            | Salmonella sepsis                                          | 7                                 | No                 |

Class 1 & 2 (CM1 & 2) are the “true CM” while Class 3 (CM3) are the “Faux CM”. CM3 mimics CM during life so these children are control for being really sick and for premorbid events but in fact there is no sequestration and there is an alternative cause of death – suggesting a different pathogenic process - so they represent an excellent comparator for sequestration driven pathology. Class 7= Non-malarial encephalopathy, infectious. SMA, severe malarial anemia.
